1 Characterisation of Antibody Interactions with the G Protein of Vesicular Stomatitis  
2 Virus Indiana Strain and Other Vesiculovirus G Proteins

3 Altar M Munis<sup>a,b</sup>, Maha Tijani<sup>a,b</sup>, Mark Hassall<sup>c</sup>, Giada Mattiuzzo<sup>c</sup>, Mary K Collins<sup>a,b,d</sup>  
4 and Yasuhiro Takeuchi<sup>a,b</sup>#.

5

6 <sup>a</sup>Division of Advanced Therapies, National Institute for Biological Standards and  
7 Control, South Mimms, UK

8 <sup>b</sup>Division of Infection and Immunity, University College London, London, UK

9 <sup>c</sup>Division of Virology, National Institute for Biological Standards and Control, South  
10 Mimms, UK

11 <sup>d</sup>Okinawa Institute of Science and Technology, Okinawa, Japan

12

13 Running Title: Interactions between antibodies and vesiculoviruses

14

15 #Correspondence should be addressed to Y.T.

16 Division of Infection and Immunity

17 UCL, Cruciform Building, Room 1.3.11

18 Gower Street

19 London

20 WC1E 6BT

21 United Kingdom

22 Tel: +44 20 3108 2144 (ext 52144).

23 Fax: +44 20 3108 2123

24 ([y.takeuchi@ucl.ac.uk](mailto:y.takeuchi@ucl.ac.uk))

25

26

27

28

## 29 **ABSTRACT**

30 Vesicular stomatitis virus Indiana strain G protein (VSVind.G) is the most commonly  
31 used envelope glycoprotein to pseudotype lentiviral vectors (LV) for experimental and  
32 clinical applications. Recently, G proteins derived from other vesiculoviruses (VesG),  
33 for example Cocal virus, have been proposed as alternative LV envelopes with  
34 possible advantages compared to VSVind.G. Well-characterised antibodies that  
35 recognise VesG will be useful for vesiculovirus research, development of G protein-  
36 containing advanced therapy medicinal products (ATMPs), and deployment of  
37 VSVind-based vaccine vectors. Here we show that one commercially available  
38 monoclonal antibody, 8G5F11, binds to and neutralises G proteins from three strains  
39 of VSV as well as Cocal, and Maraba viruses, whereas the other commercially  
40 available monoclonal anti-VSVind.G antibody, IE9F9, binds to and neutralises only  
41 VSVind.G. Using a combination of G protein chimeras and site-directed mutations,  
42 we mapped the binding epitopes of IE9F9 and 8G5F11 on VSVind.G. IE9F9 binds  
43 close to the receptor binding site and competes with soluble low-density lipoprotein  
44 receptor (LDLR) for binding to VSVind.G, explaining its mechanism of neutralisation.  
45 In contrast, 8G5F11 binds close to a region known to undergo conformational changes  
46 when the G protein moves to its post-fusion structure, and we propose that 8G5F11  
47 cross-neutralises VesGs by inhibiting this.

## 48 **IMPORTANCE**

49 VSVind.G is currently regarded as the gold-standard envelope to pseudotype lentiviral  
50 vectors. However, recently other G proteins derived from vesiculoviruses have been  
51 proposed as alternative envelopes. Here, we investigated two anti-VSVind.G  
52 monoclonal antibodies for their ability to cross-react with other vesiculovirus G  
53 proteins, and identified the epitopes they recognise, and explored the mechanisms  
54 behind their neutralisation activity. Understanding how cross-neutralising antibodies  
55 interact with other G proteins may be of interest in the context of host-pathogen  
56 interaction and co-evolution as well as providing the opportunity to modify the G  
57 proteins and improve G protein-containing medicinal products and vaccine vectors.

58

## 59 **INTRODUCTION**

60 The rhabdovirus, vesicular stomatitis virus Indiana stain (VSVind), has been used  
61 ubiquitously as a model system to study humoral and cellular immune responses in  
62 addition to being a promising virus for oncolytic virotherapy against cancer (1-3).  
63 Furthermore, its single envelope G protein (VSVind.G) is the most commonly used  
64 envelope to pseudotype lentiviral vectors and serves as the gold-standard in many  
65 experimental and clinical studies (4-6). Both receptor recognition and membrane  
66 fusion of the wild-type virus, as well as the pseudotyped particles, are mediated by this  
67 single transmembrane viral glycoprotein that homotrimerises and protrudes from the  
68 viral surface (7-9). Recently G proteins derived from other vesiculovirus subfamily  
69 members, namely, Cocal, Piry, and Chandipura viruses, have been proposed as  
70 alternative envelopes for lentiviral vector production due to some possible advantages  
71 over VSVind.G (10-12).

72 Although some antigenic and biochemical characteristics of VSVind.G have been  
73 reported (1, 7, 13-20), there is still little known about the other vesiculovirus G proteins  
74 (VesG) and there is a general lack of reagents commercially available to identify,  
75 detect, and characterise them. In the past, monoclonal antibodies (mAbs) have been  
76 used to extensively study the antigenic determinants found on viral glycoproteins, e.g.  
77 hemagglutinin (HA) of influenza virus, the gp70 protein of murine leukaemia virus  
78 (MLV), and rabies virus G protein (21-25). These previous studies, especially on the  
79 influenza virus strains and the rabies virus have led to invaluable findings on the  
80 structure and function of the glycoproteins allowing identification of epitopes essential  
81 in virus neutralisation (25-27). In addition, mAbs have proven useful in viral  
82 pathogenesis studies as mutants selected by antibodies, in many cases demonstrated  
83 altered pathogenicity to their wild-type counterparts (28-30). Therefore, identification  
84 of antibodies that recognise VesG will not only be extremely valuable for vesiculovirus  
85 research but also aid in the development of G protein-containing advanced therapy  
86 medicinal products (ATMP) and vaccine vectors.

87 Here we show two anti-VSVind.G antibodies, 8G5F11 and a goat polyclonal antibody,  
88 VSV-Poly (31, 32), can cross-react with a variety of the VesG and cross-neutralise  
89 VesG-LV. We also demonstrate that the other commercially available extracellular  
90 monoclonal anti-VSVind.G antibody IE9F9 lacks this cross-reactivity. We further

91 characterise the two mAbs, 8G5F11 and IE9F9, with regards to their relative affinities  
92 towards various VesG, binding epitopes, and cross-neutralisation strengths.

93

## 94 **RESULTS**

### 95 **Investigation of antibody cross-reactivity with VesG**

96 To investigate antibody binding to different vesiculovirus envelope glycoproteins (G  
97 proteins), we prepared plasmid pMD2-based vectors expressing six different  
98 vesiculovirus G proteins (VesG): VSVind.G, Cocal virus G (COCV.G), Vesicular  
99 stomatitis virus New Jersey strain G (VSVnj.G), Piry virus G (PIRYV.G), Vesicular  
100 stomatitis virus Alagoas strain G (VSVala.G), and Maraba virus G (MARAV.G) (Figure  
101 1A). HEK293T cells were transfected with these plasmid constructs, stained with the  
102 different antibodies, and analysed via flow cytometry. While IE9F9 only bound to  
103 VSVind.G, anti-VSVind.G monoclonal antibody 8G5F11 and VSV-Poly both could  
104 recognise various VesG with varying binding strengths (Figure 1B). PIRYV.G, the  
105 most distant vesiculovirus G investigated with approximately 40% identity to VSVind.G  
106 on amino acid level, could be recognised by VSV-Poly while 8G5F11 did not bind to  
107 it.

### 108 **Characterisation of IE9F9 binding, 8G5F11 cross-reactivity and its affinity** 109 **towards other VesG**

110 To confirm that the difference of 8G5F11 binding to VesG was indicative of the mAb  
111 affinity towards VesG and not a difference in relative expression levels of the G  
112 proteins, we synthesised chimeric G proteins. The endogenous transmembrane and  
113 C-terminal domains of VesG were switched with that of VSVind.G (Figure 2A).  
114 Following the expression of these chimeric G proteins in HEK293T cells, we  
115 investigated 8G5F11 and IE9F9 binding saturation using quantitative flow cytometry  
116 while the relative expression levels of the G proteins were monitored using an  
117 intracellular anti-VSVind.G mAb, P5D4 (Figure 2B). 8G5F11 showed a wide range of  
118 affinities towards VesG: while its affinity for MARAV.G was comparable to that of  
119 VSVind.G, its interactions with COCV.G and VSVnj.G were much weaker.

120 To consolidate this finding, we further investigated these mAb-G protein interactions  
121 via surface plasmon resonance. First, to quantify mAb binding to G protein monomers  
122 under conformationally correct folding, we immobilised wild-type (wt) VSVind.G  
123 produced by thermolysin limited proteolysis of viral particles (Gth) (7, 17) and tested  
124 the dose-dependent binding of the two mAbs (Figure 2C-D). The measured Kd values

125 for 8G5F11 and IE9F9 binding to VSVind.G were 2.76nM and 14.7nM respectively.  
126 To further analyse the VesG-8G5F11 interaction we immobilised the mAb and  
127 investigated VesG pseudotyped lentiviral vector (LV) binding. Since pseudotyped LV  
128 particles contain many trimeric G protein spikes (33), the analysis of the interaction  
129 between VesG binding to immobilised 8G5F11 reflects avidity. Dose-response  
130 binding of VSVind.G resulted in a strong response implying high avidity.  
131 (Supplementary Figure S1). When identical doses of VesG-LV at  $1 \times 10^8$  TU/ml were  
132 injected on immobilized 8G5F11, similar patterns of binding were observed to that of  
133 quantitative flow cytometry, in the order of strength of VSVind > MARAV > VSVala >  
134 Cocal > VSVnj (Figure 2E). Unrelated RDpro envelope pseudotyped LVs were utilised  
135 as negative control to deduce unspecific interaction of enveloped particles with  
136 immobilised mAb. PIRYV.G-LV demonstrated a similar response to that of RDpro-LV  
137 indicative of the lack of binding between the G protein and 8G5F11.

#### 138 **Determining the cross-neutralisation abilities of anti-VSVind.G antibodies**

139 These three antibodies were evaluated for their ability to neutralise VSVind.G and  
140 VesG pseudotyped LVs (Figure 3). 8G5F11 demonstrated varying strengths of  
141 neutralisation against VesG pseudotyped LVs, IC50 values ranging from 11.5ng/ml to  
142 86.9 $\mu$ g/ml (Figure 3A). There was however limited correlation between G proteins'  
143 binding strength and sensitivity of LV, e.g. VSVnj.G-LV was more sensitive than  
144 COCV.G-LV (Figure 3A) while COCV.G binding was stronger (Figure 1 and 2). IE9F9  
145 neutralised only VSVind.G-LV at 137ng/ml IC50, about 12-fold weaker than 8G5F11  
146 (Figure 3B). In the case of VSV-Poly, we only observed cross neutralisation at high  
147 serum concentrations (Figure 3C). Furthermore, although VSV-Poly bound to  
148 PIRYV.G, it did not neutralise PIRYV.G-LVs.

#### 149 **Mapping the epitopes of anti-VSVind.G mAbs and identification of key amino** 150 **acid residues that dictate antibody binding and neutralisation**

151 To map where the neutralising antibodies might bind to on the G protein surface a  
152 series of chimeric G proteins between VSVind.G and COCV.G were constructed. The  
153 initial binding and neutralisation studies performed with these chimeras enabled us to  
154 narrow down the epitopes of these mAbs to lie between amino acid (aa) residues 137-

155 369<sup>1</sup> on VSVind.G (Supplementary Figure S2). Furthermore, looking at previously  
156 published data on 8G5F11 and IE9F9's epitopes obtained through mutant virus  
157 escape assays (1, 13-15) we concentrated on two distinct regions on VSVind.G and  
158 synthesized 22 different mutant G proteins to study the epitopes (Figure 4). The  
159 mutants were cloned into the pMD2 backbone and their functionality were investigated  
160 via LV infection and antibody binding assays. All G proteins were confirmed to be  
161 functional and could successfully pseudotype LVs yielding comparable titres to their  
162 wild-type (wt) counterparts. Furthermore, their relative expression levels were  
163 monitored by intracellular P5D4 which also recognises the intracellular domain of  
164 COCV.G. Lastly, they could be detected by extracellular VSV-Poly implying there  
165 weren't any substantial protein display issues (Supplementary Figure S3).

166 We first investigated antibody binding to these G proteins via flow cytometry. Relative  
167 expression levels of the mutants were determined by extracellular VSV-Poly and  
168 intracellular P5D4 stains. For both sets the relative difference between expression  
169 levels of mutant and wt proteins was in most cases less than two-fold (Figure 5A-B).  
170 In the case of 8G5F11, binding to VSVind.G mutants was reduced by approximately  
171 100-fold while the changes on COCV.G enabled these mutants to bind to 8G5F11 at  
172 similar levels to that of wt VSVind.G (Figure 5C). This change in binding could also  
173 be observed on a western blot. While none of the VSVind.G mutants could be  
174 visualized, 8G5F11 could bind to COCV.G chimera C8.3 (data not shown). It can be  
175 inferred from these results that aa 257-259 (DKD) are the main residues that dictate  
176 8G5F11 binding to G proteins.

177 On the other hand, for IE9F9 no statistically significant changes in antibody binding  
178 were observed for VSVind.G mutants (data not shown) except for chimeras V1.2 and  
179 V1.4 (Figure 5D). However, there was a substantial gain of binding effect for COCV.G  
180 mutants. While IE9F9 doesn't bind to wt COCV.G, mutations of amino acid residues  
181 LSR and AA (Figure 4) alone led to significant increase in the fluorescence signal, thus  
182 antibody binding, C1.4 with both LSR and AA had a comparable MFI level to that of  
183 wt VSVind.G.

---

<sup>1</sup> It should be noted that the amino acid sequence of the full-length G proteins (including the signal peptide) were referred to in this manuscript. Accordingly, reference to specific residue numbers is made in the context of these full-length sequences.



184 Neutralisation profile of both VSVind.G and COCV.G mutants was also examined  
185 (Figure 5E-H). While LVs pseudotyped with VSVind.G mutants were not neutralised  
186 (Figure 5E), varying degrees of sensitivity were observed for COCV.G mutants with  
187 the strongest binder being the most sensitive (Figure 5F). On the other hand, this was  
188 not the case for IE9F9 mutants. While dose-dependent neutralisation of V1.2-LV was  
189 observed, VSVind.G mutant V1.4-LV was resistant to IE9F9 neutralisation (Figure  
190 5G). Furthermore, no effect was observed on COCV.G mutant LV infection even  
191 though all bound to the mAb, some at similar levels to wt VSVind.G (Figure 5H). The  
192 data shows that while 8G5F11 employs a neutralisation mechanism that is universally  
193 effective amongst the tested VesG, IE9F9's is VSVind.G specific and binding does not  
194 necessarily result in neutralisation.

195 **Investigation of neutralisation mechanisms utilised by the mAbs: binding**  
196 **competition with low-density lipoprotein receptor (LDLR)**

197 Antibodies neutralise viruses and viral vectors by several mechanisms. Many  
198 neutralising antibodies (NAbs) prevent virions from interacting with cellular receptors  
199 (34). VSVind.G's major receptor has been identified as the low-density lipoprotein  
200 receptor (LDLR) (33, 35). Therefore, we investigated the binding competition between  
201 8G5F11 and IE9F9 with LDLR via SPR as a potential neutralisation mechanism for  
202 the mAbs (Figure 6). Gth immobilised on the chip surface was saturated with repeated  
203 injections of 8G5F11 and IE9F9. This was followed by an injection of recombinant  
204 soluble human LDLR (sLDLR) and its binding to Gth was examined. While sLDLR  
205 was able to bind to Gth following 8G5F11 saturation as well as Gth without antibody  
206 exposure (buffer control), this interaction was almost completely abrogated by IE9F9.  
207 These data suggest that IE9F9, but not 8G5F11, neutralises VSVind.G-LV by blocking  
208 the G protein-receptor interaction either through steric hindrance or direct competition.

209 **DISCUSSION**

210 VSVind.G is the most commonly used envelope glycoprotein to pseudotype LVs for  
211 experimental and clinical applications. VSVind.G pseudotyped LVs can be produced  
212 in high titres and can infect a range of target cells. However, VSVind.G is cytotoxic to  
213 cells; thus, it is difficult to express it constitutively (36, 37). Moreover, VSVind.G  
214 pseudotyped LVs can be inactivated by human serum complement which limits their  
215 potential *in vivo* use (38-42). Therefore, there is a clear need for alternative envelopes



216 to pseudotype LVs. Some of the most recent alternative envelopes that have been  
217 utilised are the G proteins of the other vesiculovirus family members (10-12).  
218 However, one drawback of using these new G proteins is that there are no reagents  
219 commercially available to identify or characterise them.

220 In this report, we have demonstrated that 8G5F11 monoclonal antibody can, unlike  
221 VSVind.G specific IE9F9, cross-react with a variety of the VesG and cross-neutralise  
222 VesG-LV. Furthermore, we characterised a goat anti-VSVind.G polyclonal antibody  
223 which also can bind and neutralise a wide range of vesiculovirus G proteins.

224 The cross-reactive monoclonal 8G5F11 demonstrated interesting characteristics. Its  
225 high cross-reactivity even towards more distant relatives of VSVind.G such as  
226 VSVnj.G suggested that it might be recognising a well-conserved epitope. However,  
227 the results of the binding saturation assay didn't correlate with phylogenetic relativity.  
228 It revealed that its affinity towards COCV.G, one of the closest relatives of VSVind.G,  
229 was one of the weakest amongst the VesG investigated with almost a 250-fold  
230 difference compared to VSVind.G (Figure 2B).

231 This discrepancy can be explained through fine mapping of the 8G5F11 epitope. We  
232 identified the amino acids 257-259, DKD, as the key residues on VSVind.G for 8G5F11  
233 binding. On VSVind.G the two negatively charged aspartic acid residues flank the  
234 positively charged lysine possibly contributing towards the structure of the  $\alpha$ -helix form  
235 through salt-bridges (7, 16, 17). When either of the aspartic acid residues is mutated  
236 to a neutral residue a significant reduction in binding is observed. When this is  
237 compared to the corresponding three residues on other VesG, the antibody binding is  
238 dependent on the overall charge of these three residues rather than the ones  
239 surrounding them. In MARAV.G, these residues are identical to VSVind.G, explaining  
240 why the antibody has similar strength of binding to these two G proteins  
241 (Supplementary Figure S4). On the other hand, VSVala.G binds 8G5F11 with high  
242 affinity although these residues are not fully conserved, as in VSVala.G the second  
243 aspartic acid residue is replaced with a glutamic acid. But it is possible that the  
244 conservation of the second negative charge and the structural similarities between  
245 these two residues enable a robust G protein-antibody interaction. Lastly, VEQ  
246 corresponding aa residues in PIRYV.G, VEQ, have electrostatically and structurally

247 different characteristics to that of lysine and aspartic acid leading to the lack of  
248 interaction between the mAb and G protein.

249 We showed that IE9F9 recognises a  $\beta$ -sheet rich domain of the G protein (7, 17). A  
250 complete abrogation of binding wasn't observed with the VSVind.G mutants produced.  
251 This implies that the antibody either relies on other structural cues and environmental  
252 charges around for binding or can utilise a secondary epitope. However, through the  
253 gain of binding effect observed in COCV.G mutants, we were able to identify two  
254 regions; AA and LSR, aa residues 352-353 and 356-358 respectively on VSVind.G,  
255 that are the key to this antibody's interaction.

256 All three reagents investigated demonstrated neutralising activities. 8G5F11 had the  
257 greatest ability to cross-neutralise a wide array of vesiculovirus family members. The  
258 strength of neutralisation for this mAb, however, didn't correlate with its affinity towards  
259 other VesG (Figure 2 and 3). This suggests that innate differences, such as protein  
260 structure, between the VesG might be playing a role in LV neutralisation. Since the  
261 structures of the VesG other than VSVind.G and CHAV.G are not yet delineated, it is  
262 hard to accurately point out the key factors and mechanism involved. However, we  
263 have identified 8G5F11's epitope to lie close to the cross-over point between pleckstrin  
264 homology and trimerisation domain of VSVind.G (7, 17, 19, 20, 35). Several hinge  
265 segments have been identified in the proximity of the epitope which undergo large  
266 rearrangements in its relative orientation while the G protein refolds from pre to post-  
267 fusion conformation in the low-pH conditions of the endosomes following endocytosis  
268 (16, 19, 35). It can be hypothesised that 8G5F11 might be hindering this process  
269 ultimately preventing viral fusion and infection. As pH-induced conformational  
270 changes during viral fusion is a shared characteristic amongst VesG (43), this might  
271 be the underlying reason behind 8G5F11's ability to cross-neutralise VesG-LV.

272 We have shown that IE9F9 blocks VSVind.G binding to its major receptor LDLR  
273 (Figure 6). The crystal structures of VSVind.G in complex with LDLR domains have  
274 been recently identified and have shown that VSVind.G can interact with two distinct  
275 cysteine-rich domains (CR2 and CR3) of LDLR (35). One of the regions on VSVind.G  
276 that is crucial for LDLR CR domain binding lies between amino acids 366-370, only  
277 seven amino acids away from the key residues in IE9F9's epitope. The key residues  
278 in this region of VSVind.G are not conserved amongst vesiculoviruses therefore,

279 neither the use of this epitope nor LDLR can be generalised to the other members of  
280 the genus, making IE9F9's epitope and neutralisation mechanism specific to  
281 VSVind.G. The lack of cross-reactivity and cross-neutralisation (Figure 1 and 3)  
282 displayed by the mAb towards VesG as well as its failure to neutralise COCV.G  
283 mutants when its epitope is inserted into the G protein (Figure 5) suggest specific  
284 requirement for binding mode between IE9G9 and G proteins to result in  
285 neutralisation. Nikolic and colleagues have demonstrated that VSVind.G has  
286 specifically evolved to interact with the CR domains of other LDLR family members  
287 (35). The other members of the receptor family have already been identified as  
288 secondary ports of entry for the virus (33). Complete neutralisation achieved with  
289 IE9F9 indicates that the other LDLR family members might be interacting with the  
290 same epitope on VSVind.G as well.

291 Further work on these two identified epitopes regarding their immunodominance in an  
292 *in vivo* setting and their detailed characterisation on other VesG from the structure-  
293 function point of view may be of interest in the context of host-pathogen interaction  
294 and co-evolution. This may also provide the opportunity for modifying VSVind.G to  
295 improve G protein-containing advanced therapy medicinal products and VSVind-  
296 based vaccine vectors.

297

## 298 REFERENCES

- 299 1. Keil W, Wagner RR. 1989. Epitope mapping by deletion mutants and chimeras of two  
300 vesicular stomatitis virus glycoprotein genes expressed by a vaccinia virus vector. *Virology*  
301 170:392-407.
- 302 2. Wagner RR. 1987. Rhabdovirus biology and infection: An overview., p 9-74. *In* Wagner RR  
303 (ed), *The Rhabdoviruses*. Plenum, New York.
- 304 3. Hastie E, Grdzlishvili VZ. 2012. Vesicular stomatitis virus as a flexible platform for oncolytic  
305 virotherapy against cancer. *Journal of General Virology* 93:2529-2545.
- 306 4. Naldini L, Blomer U, Gallay P, Ory D, Mulligan R, Gage FH, Verma IM, Trono D. 1996. In vivo  
307 gene delivery and stable transduction of nondividing cells by a lentiviral vector. *Science*  
308 272:263-267.
- 309 5. Bhella RS, Nichol ST, Wanas E, Ghosh HP. 1998. Structure, expression and phylogenetic  
310 analysis of the glycoprotein gene of Cocal virus. *Virus Res* 54:197-205.
- 311 6. Reiser J, Harmison G, KluepfelStahl S, Brady RO, Karlson S, Schubert M. 1996. Transduction  
312 of nondividing cells using pseudotyped defective high-titer HIV type 1 particles. *Proceedings*  
313 *of the National Academy of Sciences of the United States of America* 93:15266-15271.
- 314 7. Roche S, Rey FA, Gaudin Y, Brassanelli S. 2007. Structure of the pre-fusion form of the  
315 vesicular stomatitis virus  
316 glycoprotein g. *Science* 315:843-848.
- 317 8. Bishop DH, Repik P, Obijeski JF, Moore NF, Wagner RR. 1975. Restitution of infectivity to  
318 spikeless vesicular stomatitis virus by solubilized viral components. *J Virol* 16:75-84.
- 319 9. Matlin KS, Reggio H, Helenius A, Simons K. 1982. Pathway of vesicular stomatitis virus entry  
320 leading to infection. *J Mol Biol* 156:609-31.
- 321 10. Humbert O, Gisch DW, Wohlfahrt ME, Adams AB, Greenberg PD, Schmitt TM, Trobridge GD,  
322 Kiem HP. 2016. Development of Third-generation Cocal Envelope Producer Cell Lines for  
323 Robust Lentiviral Gene Transfer into Hematopoietic Stem Cells and T-cells. *Mol Ther*  
324 24:1237-46.
- 325 11. Trobridge GD, Wu RA, Hansen M, Ironside C, Watts KL, Olsen P, Beard BC, Kiem HP. 2010.  
326 Cocal-pseudotyped lentiviral vectors resist inactivation by human serum and efficiently  
327 transduce primate hematopoietic repopulating cells. *Mol Ther* 18:725-33.
- 328 12. Hu S, Mohan Kumar D, Sax C, Schuler C, Akkina R. 2016. Pseudotyping of lentiviral vector  
329 with novel vesiculovirus envelope glycoproteins derived from Chandipura and Piry viruses.  
330 *Virology* 488:162-8.
- 331 13. Lefrancois L, Lyles DS. 1983. Antigenic determinants of vesicular stomatitis virus: analysis  
332 with antigenic variants. *J Immunol* 130:394-8.
- 333 14. Lefrancois L, Lyles DS. 1982. The interaction of antibody with the major surface glycoprotein  
334 of vesicular stomatitis virus. I. Analysis of neutralizing epitopes with monoclonal antibodies.  
335 *Virology* 121:157-67.
- 336 15. Vandepol SB, Lefrancois L, Holland JJ. 1986. Sequences of the major antibody binding  
337 epitopes of the Indiana serotype of vesicular stomatitis virus. *Virology* 148:312-25.
- 338 16. Roche S, Albertini AAV, Lepault J, Bressanelli S, Gaudin Y. 2008. Structures of vesicular  
339 stomatitis virus glycoprotein: membrane fusion revisited. *Cellular and Molecular Life*  
340 *Sciences* 65:1716-1728.
- 341 17. Roche S, Bressanelli S, Rey FA, Gaudin Y. 2006. Crystal structure of the low-pH form of the  
342 vesicular stomatitis virus glycoprotein G. *Science* 313:187-91.
- 343 18. Albertini AA, Merigoux C, Libersou S, Madiona K, Bressanelli S, Roche S, Lepault J, Melki R,  
344 Vachette P, Gaudin Y. 2012. Characterization of Monomeric Intermediates during VSV  
345 Glycoprotein Structural Transition. *Plos Pathogens* 8.

- 346 19. Baquero E, Albertini AA, Raux H, Abou-Hamdan A, Boeri-Erba E, Ouldali M, Buonocore L,  
347 Rose JK, Lepault J, Bressanelli S, Gaudin Y. 2017. Structural intermediates in the fusion-  
348 associated transition of vesiculovirus glycoprotein. *EMBO J* 36:679-692.
- 349 20. Baquero E, Albertini AA, Vachette P, Lepault J, Bressanelli S, Gaudin Y. 2013. Intermediate  
350 conformations during viral fusion glycoprotein structural transition. *Current Opinion in*  
351 *Virology* 3:143-150.
- 352 21. Benmansour A, Leblois H, Coulon P, Tuffereau C, Gaudin Y, Flamand A, Lafay F. 1991.  
353 Antigenicity of Rabies Virus Glycoprotein. *Journal of Virology* 65:4198-4203.
- 354 22. Lubeck MD, Gerhard W. 1981. Topological mapping antigenic sites on the influenza  
355 A/PR/8/34 virus hemagglutinin using monoclonal antibodies. *Virology* 113:64-72.
- 356 23. Webster RG, Laver WG. 1980. Determination of the number of nonoverlapping antigenic  
357 areas on Hong Kong (H3N2) influenza virus hemagglutinin with monoclonal antibodies and  
358 the selection of variants with potential epidemiological significance. *Virology* 104:139-48.
- 359 24. Stone MR, Nowinski RC. 1980. Topological mapping of murine leukemia virus proteins by  
360 competition-binding assays with monoclonal antibodies. *Virology* 100:370-81.
- 361 25. Seif I, Coulon P, Rollin PE, Flamand A. 1985. Rabies virulence: effect on pathogenicity and  
362 sequence characterization of rabies virus mutations affecting antigenic site III of the  
363 glycoprotein. *J Virol* 53:926-34.
- 364 26. Wiley DC, Wilson IA, Skehel JJ. 1981. Structural identification of the antibody-binding sites of  
365 Hong Kong influenza haemagglutinin and their involvement in antigenic variation. *Nature*  
366 289:373-8.
- 367 27. Hovanec DL, Air GM. 1984. Antigenic structure of the hemagglutinin of influenza virus  
368 B/Hong Kong/8/73 as determined from gene sequence analysis of variants selected with  
369 monoclonal antibodies. *Virology* 139:384-92.
- 370 28. Dietzschold B, Wunner WH, Wiktor TJ, Lopes AD, Lafon M, Smith CL, Koprowski H. 1983.  
371 Characterization of an antigenic determinant of the glycoprotein that correlates with  
372 pathogenicity of rabies virus. *Proc Natl Acad Sci U S A* 80:70-4.
- 373 29. Spriggs DR, Fields BN. 1982. Attenuated reovirus type 3 strains generated by selection of  
374 haemagglutinin antigenic variants. *Nature* 297:68-70.
- 375 30. Zondag GCM, Postma FR, Van Etten I, Verlaan I, Moolenaar WH. 1998. Sphingosine 1-  
376 phosphate signalling through the G-protein-coupled receptor Edg-1. *Biochemical Journal*  
377 330:605-609.
- 378 31. Tamura K, Oue A, Tanaka A, Shimizu N, Takagi H, Kato N, Morikawa A, Hoshino H. 2005.  
379 Efficient formation of vesicular stomatitis virus pseudotypes bearing the native forms of  
380 hepatitis C virus envelope proteins detected after sonication. *Microbes and Infection* 7:29-  
381 40.
- 382 32. Hoshino H, Nakamura T, Tanaka Y, Miyoshi I, Yanagihara R. 1993. Functional conservation of  
383 the neutralizing domains on the external envelope glycoprotein of cosmopolitan and  
384 melanesian strains of human T cell leukemia/lymphoma virus type I. *J Infect Dis* 168:1368-  
385 73.
- 386 33. Finkelshtein D, Werman A, Novick D, Barak S, Rubinstein M. 2013. LDL receptor and its  
387 family members serve as the cellular receptors for vesicular stomatitis virus. *Proceedings of*  
388 *the National Academy of Sciences of the United States of America* 110:7306-7311.
- 389 34. Klasse PJ. 2014. Neutralization of Virus Infectivity by Antibodies: Old Problems in New  
390 Perspectives. *Adv Biol* 2014.
- 391 35. Nikolic J, Belot L, Raux H, Legrand P, Gaudin Y, AA. 2018. Structural basis for the  
392 recognition of LDL-receptor family members by VSV glycoprotein. *Nat Commun* 9:1029.
- 393 36. Burns JC, Friedmann T, Driever W, Burrascano M, Yee JK. 1993. Vesicular stomatitis virus G  
394 glycoprotein pseudotyped retroviral vectors: concentration to very high titer and efficient  
395 gene transfer into mammalian and nonmammalian cells. *Proc Natl Acad Sci U S A* 90:8033-7.

- 396 37. Hoffmann M, Wu YJ, Gerber M, Berger-Rentsch M, Heimrich B, Schwemmler M, Zimmer G.  
397 2010. Fusion-active glycoprotein G mediates the cytotoxicity of vesicular stomatitis virus M  
398 mutants lacking host shut-off activity. *J Gen Virol* 91:2782-93.
- 399 38. Tesfay MZ, Ammayappan A, Federspiel MJ, Barber GN, Stojdl D, Peng KW, Russell SJ. 2014.  
400 Vesiculovirus neutralization by natural IgM and complement. *J Virol* 88:6148-57.
- 401 39. Tesfay MZ, Kirk AC, Hadac EM, Griesmann GE, Federspiel MJ, Barber GN, Henry SM, Peng  
402 KW, Russell SJ. 2013. PEGylation of Vesicular Stomatitis Virus Extends Virus Persistence in  
403 Blood Circulation of Passively Immunized Mice. *Journal of Virology* 87:3752-3759.
- 404 40. Beebe DP, Cooper NR. 1981. Neutralization of Vesicular Stomatitis-Virus (Vsv) by Human-  
405 Complement Requires a Natural Igm Antibody Present in Human-Serum. *Journal of*  
406 *Immunology* 126:1562-1568.
- 407 41. DePolo NJ, Reed JD, Sheridan PL, Townsend K, Sauter SL, Jolly DJ, Dubensky TW, Jr. 2000.  
408 VSV-G pseudotyped lentiviral vector particles produced in human cells are inactivated by  
409 human serum. *Mol Ther* 2:218-22.
- 410 42. Croyle MA, Callahan SM, Auricchio A, Schumer G, Linse KD, Wilson JM, Brunner LJ, Kobinger  
411 GP. 2004. PEGylation of a vesicular stomatitis virus G pseudotyped lentivirus vector prevents  
412 inactivation in serum. *Journal of Virology* 78:912-921.
- 413 43. Baquero E, Albertini AA, Gaudin Y. 2015. Recent mechanistic and structural insights on class  
414 III viral fusion glycoproteins. *Curr Opin Struct Biol* 33:52-60.
- 415 44. Kumar S, Stecher G, Tamura K. 2016. MEGA7: Molecular Evolutionary Genetics Analysis  
416 Version 7.0 for Bigger Datasets. *Mol Biol Evol* 33:1870-4.
- 417 45. Jones DT, Taylor WR, Thornton JM. 1992. The rapid generation of mutation data matrices  
418 from protein sequences. *Comput Appl Biosci* 8:275-82.
- 419 46. Zufferey R, Nagy D, Mandel RJ, Naldini L, Trono D. 1997. Multiply attenuated lentiviral vector  
420 achieves efficient gene delivery in vivo. *Nat Biotechnol* 15:871-5.
- 421 47. Knight S, Sanber K, Stephen S, Ferrareso M, Baley R, Escors D, Santilli G, Thrasher A, Collins  
422 M, Takeuchi Y. 2014. A clinical-grade constitutive packaging cell line for the production of  
423 self-inactivating lentiviral vectors. *Human Gene Therapy* 25:A101-A102.
- 424 48. Sanber KS, Knight SB, Stephen SL, Bailey R, Escors D, Minshull J, Santilli G, Thrasher AJ,  
425 Collins MK, Takeuchi Y. 2015. Construction of stable packaging cell lines for clinical lentiviral  
426 vector production. *Scientific Reports* 5.

427

428



## 429 **MATERIALS AND METHODS**

430 **Cell culture.** In all experiments, HEK293T cells were used. The cell line was  
431 maintained in Dulbecco's Modified Eagle Medium (DMEM) (Sigma-Aldrich, St Louis,  
432 MO) supplemented with 10% heat-inactivated foetal calf serum (Gibco, Carlsbad, CA),  
433 2mM L-Glutamine (Gibco), 50 units/ml Penicillin (Gibco), 50µg/ml Streptomycin  
434 (Gibco). All cells were kept in cell culture incubators at 37°C and 5% CO<sub>2</sub>.

435 **Phylogenetic analysis of vesiculovirus and rabies virus G proteins based on**  
436 **amino acid sequences.** G proteins of the major vesiculoviruses (VSVind, UniProt  
437 Accession Number: P03522, Cocal virus, #O56677, VSVnj, #P04882, Piry virus,  
438 #Q85213, Maraba virus, #F8SPF4, VSVala, # B3FRL4, Chandipura virus, #P13180,  
439 Carajas virus, #A0A0D3R1Y6, Isfahan virus, # Q5K2K4) as well as the G protein of  
440 the Rabies virus (#Q8JXF6), were included in the analysis. The amino acid sequences  
441 were aligned using ClustalOmega online multiple sequence alignment tool (EMBL-  
442 EPI). The evolutionary analyses were conducted in MEGA7 (44). The evolutionary  
443 history was inferred by using the maximum likelihood method based on the Jones-  
444 Taylor-Thornton matrix-based model (45). The tree with the highest likelihood is  
445 shown with the bootstrap confidence values (out of 100) indicated at the nodes. The  
446 tree is drawn to scale, with branch lengths measured in the number of substitutions  
447 per site, depicted in the linear scale.

448 **Plasmids used in experiments.** VSVind.G expression plasmids, pMD2.G, and gag-  
449 pol expression plasmid p8.91 (46) were purchased from Plasmid Factory (Germany).  
450 GFP expressing self-inactivating vector plasmid used in the production of lentiviral  
451 vectors was produced in our lab previously (47, 48). pMD2.Cocal.G, COCV.G,  
452 expression plasmid was a kindly provided by Hans-Peter Kiem (Fred Hutchinson  
453 Cancer Research Center, Seattle, WA) . All other VesG envelopes were cloned into  
454 this backbone using the restriction enzymes PmlI and EcoRI. Amino acid sequences  
455 for VSVnj.G, PIRYV.G, MARAV.G, VSVala.G were retrieved from UniProt. Codon-  
456 optimised genes were ordered from Genewiz (South Plainfield, NJ). Unrelated feline  
457 endogenous virus RD114 derived RDpro envelope (48) was used as a negative control  
458 in several assays.

459 **Gene transfer to mammalian cells.** Single plasmid transfection was used to express  
460 VesG on HEK293T cell surface. HEK293T cells were seeded on the day prior to



461 transfection at  $4 \times 10^6$  cell per 10cm plate. These cells were transfected by lipofection  
462 using FuGENE6 (Promega, Madison, WI) according to the manufacturer's  
463 instructions. The cells were harvested 48h later to be used in various flow cytometry  
464 assays.

465 **Overlapping extension PCR to synthesise VesG chimeras.** Phusion High-Fidelity  
466 PCR Kit (NEB, Ipswich, MA) was used to perform the PCR reactions. All primers used  
467 were obtained from Sigma-Aldrich (Supplementary Table 1). To splice two DNA  
468 molecules, special primers were at the joining ends. For each molecule, the first of two  
469 PCRs created a linear insert with a 5' overhang complementary to the 3' end of the  
470 sequence from the other gene. Following annealing, these extensions allowed the  
471 strands of the PCR product to act as a pair of oversized primers and the two  
472 sequences were fused. Once both DNA molecules were extended, a second PCR was  
473 carried out with only the flanking primers to amplify the newly created double-stranded  
474 DNA of the chimeric gene.

475 **Surface plasmon resonance.** Analyses were performed using a BIAcore T100  
476 instrument (GE Healthcare). Gth (0.04 mg/mL) and 8G5F11 (0.03 mg/mL) in sodium  
477 acetate buffers (10mM, pH 4.5 and 4.0 respectively) were immobilised on a CM5  
478 sensor chip using the amine coupling system according to the manufacturer's  
479 instructions. To measure mAb affinity to VSVind.G, 8G5F11 (MW 155kDa) and IE9F9  
480 (MW 155kDa) were suspended in HBS-EP (0.01M HEPES pH7.4, 0.15M NaCl, 3mM  
481 EDTA, 0.005v/v P20) and passed over the immobilised Gth at the indicated  
482 concentrations. To measure VesG-LV avidity against 8G5F11, LV preparations were  
483 suspended in HBS-EP buffer and passed over the immobilised mAb at indicated titers.  
484 The dissociation constants were calculated using BIAevaluation software according to  
485 the manufacturer's instructions. For the competitive binding assay, multiple injections  
486 of mAbs at 10 $\mu$ g/mL concentration was performed followed by injection of soluble  
487 recombinant LDLR (R&D Systems, Minneapolis, MN) at an identical concentration.

488 **Use of molecules of equivalent soluble fluorochrome (MESF) system for**  
489 **quantitative flow-cytometry analysis.** Quantum Alexa Fluor 647 MESF kit (Bangs  
490 Laboratories, Fishers, IN) was utilised for all quantitative fluorescence flow cytometry  
491 experiments. This is a microsphere kit that enables the standardisation of  
492 fluorescence intensity units. Beads with a pre-determined number of fluorophores are

493 run on the same day and at the same fluorescence settings as stained cell samples to  
494 establish a calibration curve that relates the instrument channel values (i.e. median  
495 fluorescence intensity (MFI)) to standardised fluorescence intensity (MESF) units.

496 **SDS/PAGE.** Gth was visualised via Ponceau S staining. 15µg of Gth was boiled at  
497 95°C for 5 mins in 5X Laemmli buffer (5% Sodium dodecyl sulfate (SDS), 50% glycerol,  
498 0.1% bromophenol blue, 250mM Tris-HCl, pH 6.8, and, 5% β-mercaptoethanol) and  
499 resolved on 10% SDS-PAGE gel (10% acrylamide-Tris). Sample was then transferred  
500 onto a nitrocellulose membrane (GE Healthcare) and visualised.

501 **Extracellular and intracellular antibody binding assay.** HEK293T cells were  
502 transfected to express the G proteins. 48 hours later cells were harvested, washed  
503 twice with PBS and plated in U-bottom 96-well plates at identical densities. For  
504 intracellular antibody binding assays cells were fixed with 1% formaldehyde (Sigma-  
505 Aldrich, St Louis, MO) in PBS, permeabilised using 0.05% saponin (Sigma-Aldrich, St  
506 Louis MO) in PBS and blocked with 1% bovine serum albumin (BSA, Sigma-Aldrich,  
507 St Louis MO) in PBS. Cells were then incubated with serial dilutions of extracellular  
508 and intracellular antibodies ranging from 0.1mg/ml to 2x10<sup>-7</sup> mg/ml in 1% BSA  
509 (Sigma) in PBS in a total reaction volume of 200µl. After washing twice, each sample  
510 was incubated with its respective fluorophore-conjugated secondary antibody  
511 (Antibodies used are listed in Supplementary Table 2). Cells were then washed twice  
512 and resuspended in PBS. Stained cell samples were analysed via flow cytometry  
513 using a FACSCanto II (BD Biosciences, San Jose, CA) and Flowjo software.

514 **Transient LV production and concentration.** Three-plasmid co-transfection into  
515 HEK293T cells was used to make pseudotyped LV as described previously (46).  
516 Briefly, 4x10<sup>6</sup> 293T cells were seeded in 10cm plates. 24 hours later, they were  
517 transfected using FuGene6 (Promega, Madison, WI) with following plasmids: SIN pHV  
518 (GFP expressing vector plasmid (47, 48)), p8.91 (Gag-Pol expression plasmid (46)),  
519 and envelope expression plasmids. The medium was changed after 24 hours and then  
520 vector containing media (VCM) was collected over 24-hour periods for 2 days.  
521 Following collection, VCM was passed through Whatman Puradisc 0.45µm filters  
522 (SLS) and concentrated ~100-fold by ultra-centrifugation at 22,000 rpm (87,119xg) for  
523 2 hours at 4°C in Beckmann Optima LK-90 ultracentrifuge using the SW-28 swinging

524 bucket rotor (radius 16.1cm). The virus was resuspended in cold plain Opti-MEM on  
525 ice, aliquoted and stored at -80°C.

526 **LV titration.** The functional titre of each vector preparation was determined by flow  
527 cytometric analysis for GFP expression following transduction of HEK293T cells.  
528 Briefly,  $2 \times 10^5$ /well 293T cells were infected with LV plus 8 µg/ml polybrene (Merck-  
529 Millipore, Billerica, MA) for 24 hours. Infected cells were detected by GFP expression  
530 at 48 hours following the start of transduction. Titres were calculated from virus  
531 dilutions where 1–20% of the cell population was GFP-positive using the following  
532 formula:

$$\begin{aligned} 533 \quad & \text{Titre} \left( \frac{\text{transduction units (TU)}}{\text{ml}} \right) \\ 534 \quad & = \frac{(\text{no. of cells at transduction}) \times (\% \text{ of GFP positive cells} \div 100) \times (\text{dilution factor})}{(\text{the volume of virus preparation added (ml)})} \end{aligned}$$

535 **Antibody neutralisation assay.** To determine the neutralisation activity of anti-  
536 VSVind.G monoclonal and polyclonal antibodies an infection assay in the presence of  
537 antibodies was performed. Briefly, HEK293T cells were seeded in a 96-well plate at a  
538 density of  $2 \times 10^4$  cells/well with 200µl of medium containing 8µg/ml polybrene.  
539 Approximately 3 hours later, antibodies were serially diluted in plain Opti-MEM to 12  
540 different concentrations/dilutions ranging from 0.5mg/ml (1:2 dilution) to  $1.6 \times 10^{-7}$   
541 mg/ml (1:6,250,000 dilution). Each antibody dilution was mixed 1:1 with VesG-LV or  
542 mutant G-LV at  $4.0 \times 10^5$ TU/ml titre to a final volume of 20µl, incubated at 37°C for 1h  
543 and plated on the cells. 48 hours after cells were harvested and analysed for GFP  
544 expression by flow cytometry.

545 **Site-directed mutagenesis PCR for production of mutant G proteins for epitope**  
546 **mapping.** Site-directed mutagenesis (SMD) method was utilized to produce G protein  
547 mutants that were used in epitope mapping experiments. For this, QuikChange II XL  
548 Site-Directed Mutagenesis Kit (Agilent, Santa Clara, CA) was used. Initially, primers  
549 that would have the desired nucleotide changes were designed using the QuikChange  
550 Primer Design Tool (<http://www.genomics.agilent.com/primerDesignProgram.jsp> ).  
551 All primers used were obtained from Sigma-Aldrich (St Louis, MO). The reaction was  
552 carried out according to manufacturer's instructions.

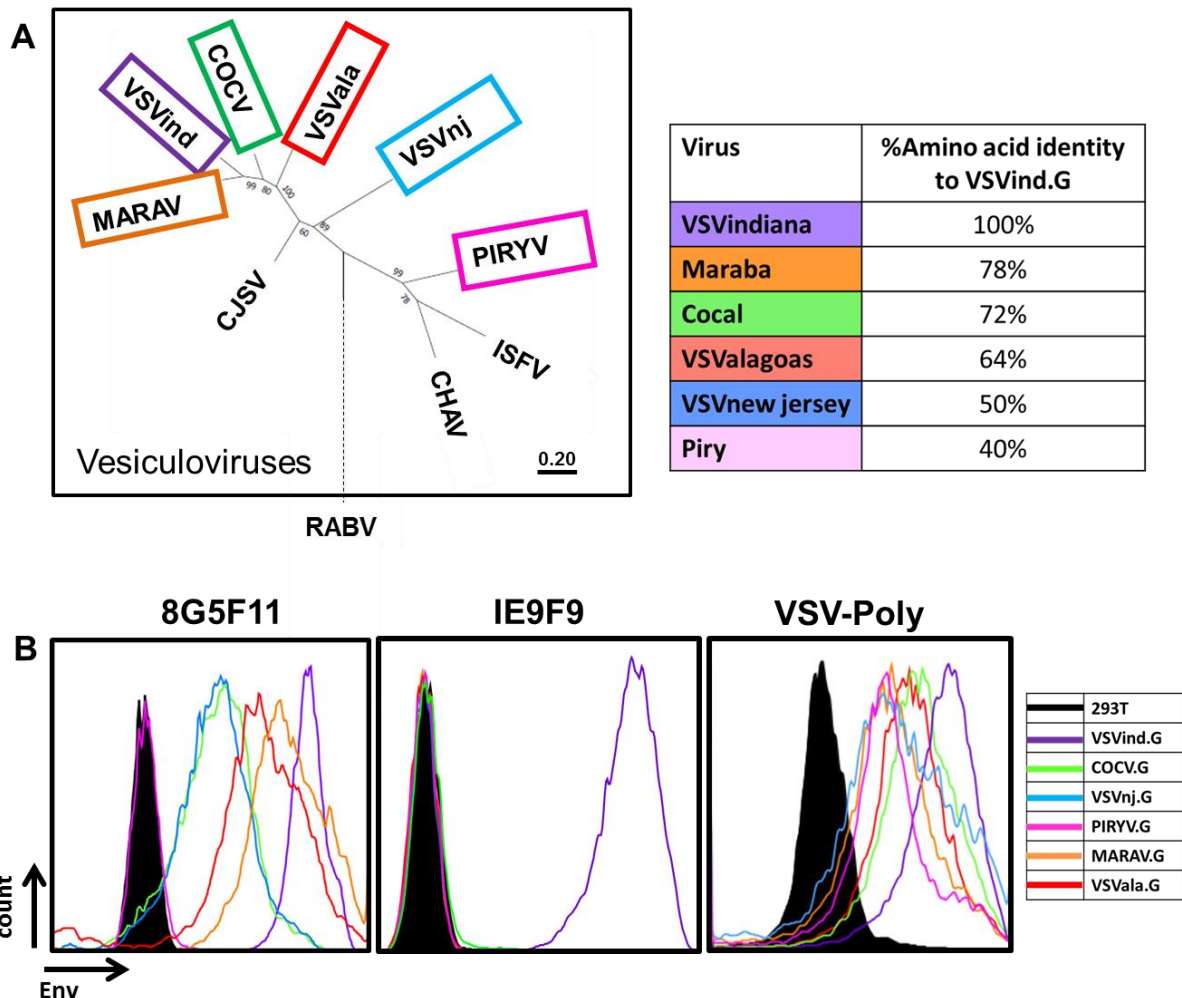

553

554 **Figure 1: 8G5F11 and VSV-Poly cross-react with a variety of VesG while IE9F9**  
555 **only binds to VSVind.G.** (A) G proteins of the major vesiculoviruses, as well as the  
556 G protein of the rabies virus (RABV), were analysed with regards to their phylogenetic  
557 relationship. The tree amongst VesG is drawn to scale, with branch lengths measured  
558 in the number of substitutions per site, depicted in the linear scale. VSVind: Vesicular  
559 stomatitis virus Indiana strain, COCV: Cocal virus, VSVnj: Vesicular stomatitis virus  
560 New Jersey strain, PIRYV: Piry virus, CJSV: Carajas virus, CHAV: Chandipura virus,  
561 ISFV: Isfahan virus, MARAV: Maraba virus, VSVala: Vesicular stomatitis virus Alagoas  
562 strain. Vesiculoviruses that we investigated are highlighted in boxes and percentage  
563 amino acid identities to VSVind.G are summarised in the table on the right-hand side.  
564 (B) Histograms represent the binding of the antibodies to the VesG expressed on the  
565 surface of transfected HEK293T cells. The strength of cross-reaction is depicted via  
566 the different MFIs of the histograms. On the other hand, IE9F9 only bound to  
567 VSVind.G. Data shown is one of the three repeats performed.

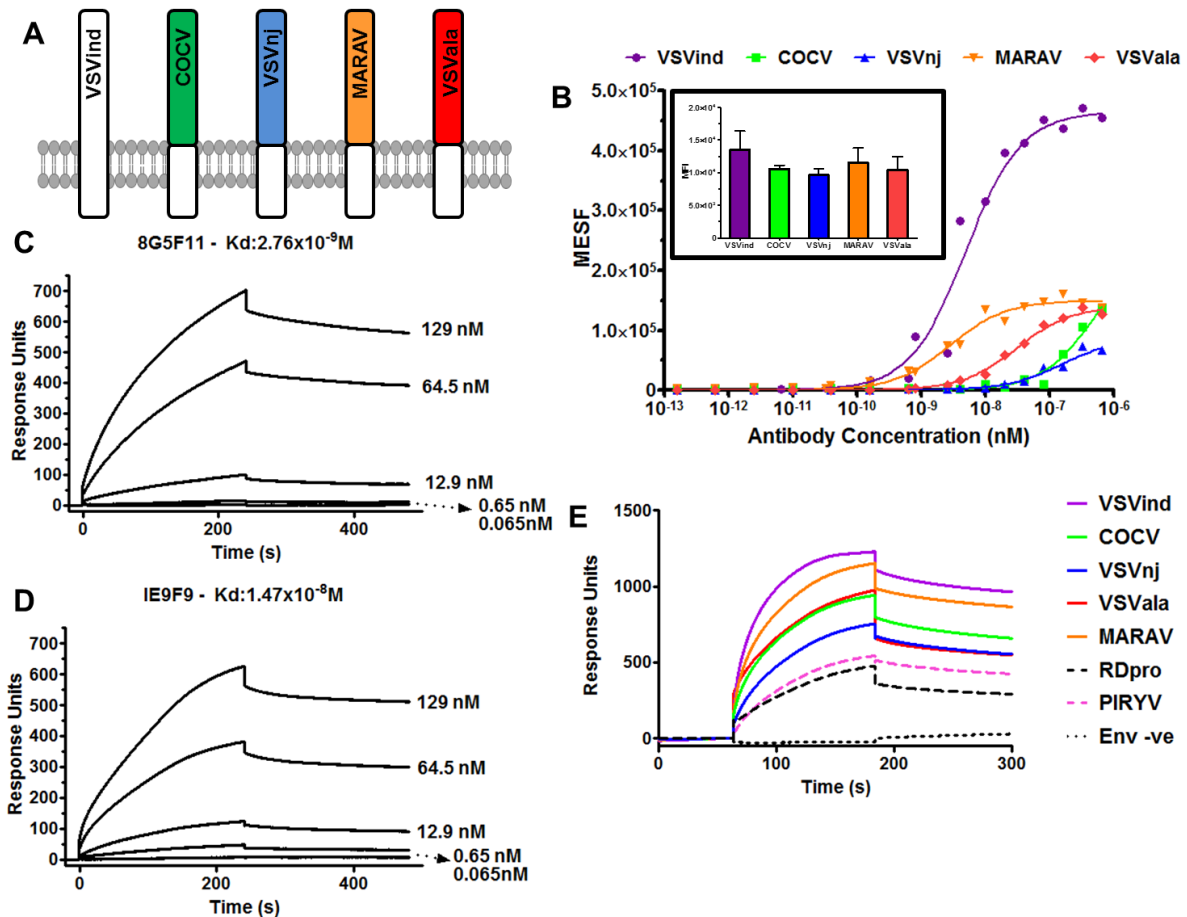

569

570 **Figure 2: Investigation of 8G5F11 and IE9F9 affinities towards VSVind.G and**

571 **characterisation of 8G5F11 cross-reactivity. (A)** Schematic representation of the

572 chimeric vesiculovirus G proteins with VSVind.G transmembrane and C-terminal

573 domains. **(B)** HEK293T cells expressing chimeric VesG were incubated with serial

574 dilutions of 8G5F11 and analysed via flow cytometry. MFIs of the fluorescent signals

575 were converted into the number of fluorophores using the MESF standard curve

576 according to manufacturer's instructions, the background signal from mock-

577 transfected HEK293Ts was subtracted and binding saturation curves were plotted.

578 The varying affinity of the mAb towards different VesG is demonstrated by the shift in

579 the slope of the binding curves. The curves were fitted, and dissociation constants

580 (Kd) calculated using the software GraphPad Prism 5 modelling the interaction as 1:1

581 specific binding: VSVind.G:  $2.64 \times 10^{-9} M$ , COCV.G:  $5.88 \times 10^{-7} M$ , VSVnj.G:  $1.57 \times 10^{-7} M$ ,

582 MARAV.G:  $4.13 \times 10^{-9} M$ , VSVala.G:  $3.09 \times 10^{-9} M$ . Data shown represent the mean of

583 three repeats performed in duplicates. **(inset)** The expression levels of the chimeric G

584 proteins were determined via intracellular P5D4 staining. Data shown represent the

585 mean +/- SD of three repeats performed in duplicates. Surface plasmon resonance  
586 (SPR) analysis of **(C)** 8G5F11 and **(D)** IE9F9 binding to immobilized Gth in HBS-EP  
587 buffer. **(E)** Surface plasmon resonance analysis of Ves.G-LV ( $1 \times 10^8$  TU/ml) binding  
588 to immobilized 8G5F11 in HBS-EP buffer. The binding curves are normalised with  
589 regards to the relative response of unenveloped LV particles (Env -ve) which is  
590 regarded as the background. SPR data shown is one of the three repeats performed.

591



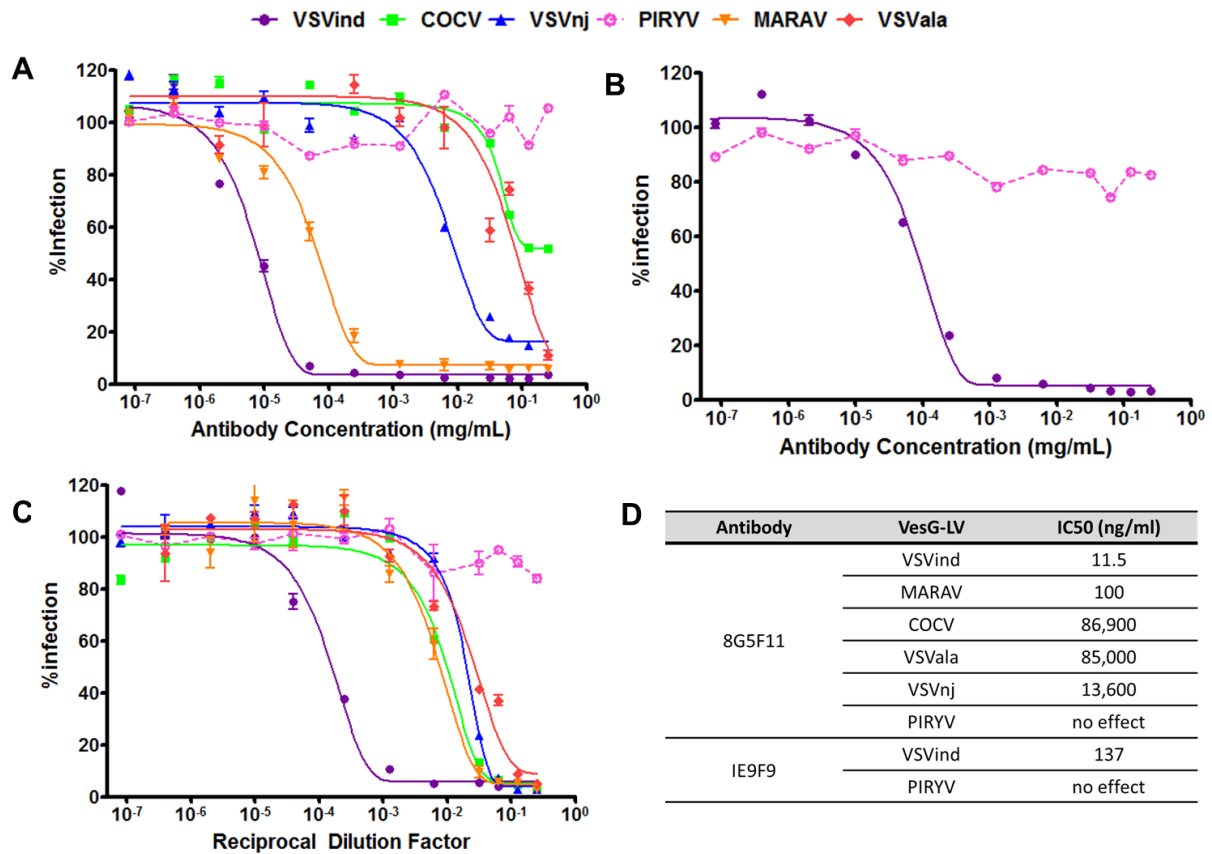

592

593 **Figure 3: Neutralisation activity of mAbs and VSV-Poly.** Neutralisation of VesG-  
 594 LV by (A) 8G5F11, (B) IE9F9, and (C) VSV-Poly. Solid lines signify the neutralisation  
 595 effect observed while the dotted lines indicate the lack of neutralisation. (D) Calculated  
 596 IC50 values for 8G5F11 and IE9F9, depicting the potency of neutralisation. The  
 597 curves were fitted using the software GraphPad Prism 5 modelled as an [inhibitor] vs.  
 598 response curve with variable Hill Slopes and IC50 values calculated. Data shown  
 599 represent the mean +/- SD of three repeats.

600

601



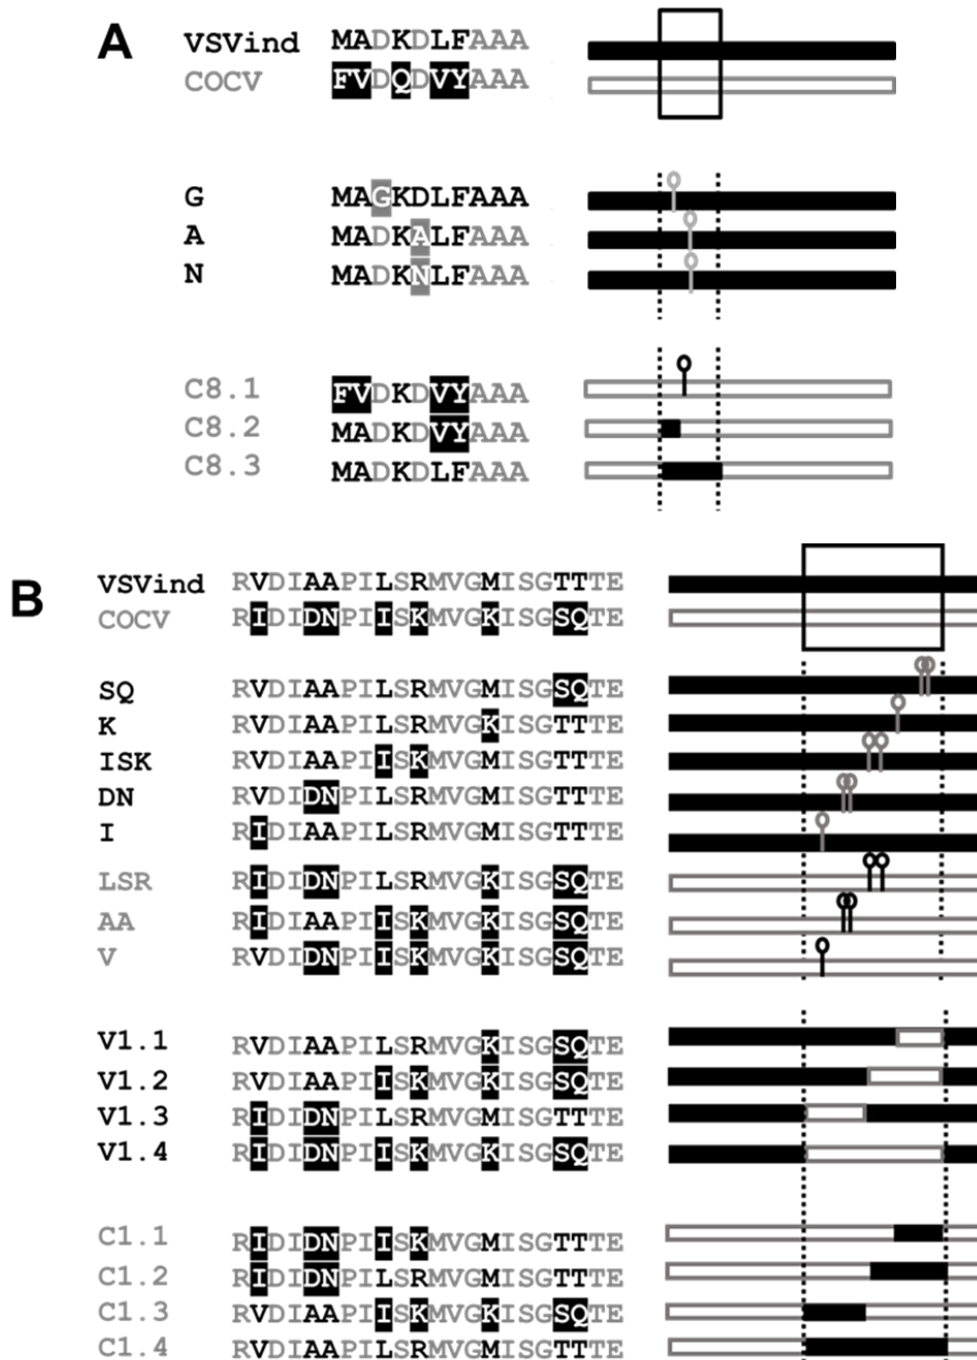

602 **Figure 4: Mutants and chimeric G proteins produced for epitope mapping.**

603 Mutants and chimeras produced for epitope mapping of monoclonal antibodies (A)  
 604 8G5F11 and (B) IE9F9. Names and linear representations of the mutants and  
 605 chimeras are listed on either side of the amino acid alignments of the regions where  
 606 mutations were made. Amino acid alignment legend: Black; residues from wt  
 607 VSVind.G, white with black background; residues from wt COCV.G, grey; shared  
 608 residues, white with grey background; previously identified mutants (15). Linear G  
 609 protein representations: the regions that the mutations were carried out at are

610 represented by dotted lines. Black bars represent wt VSVind.G sequences while grey-  
611 bordered bars are for wt COCV.G residues. Point mutations are denoted by a bar and  
612 a circle.

613

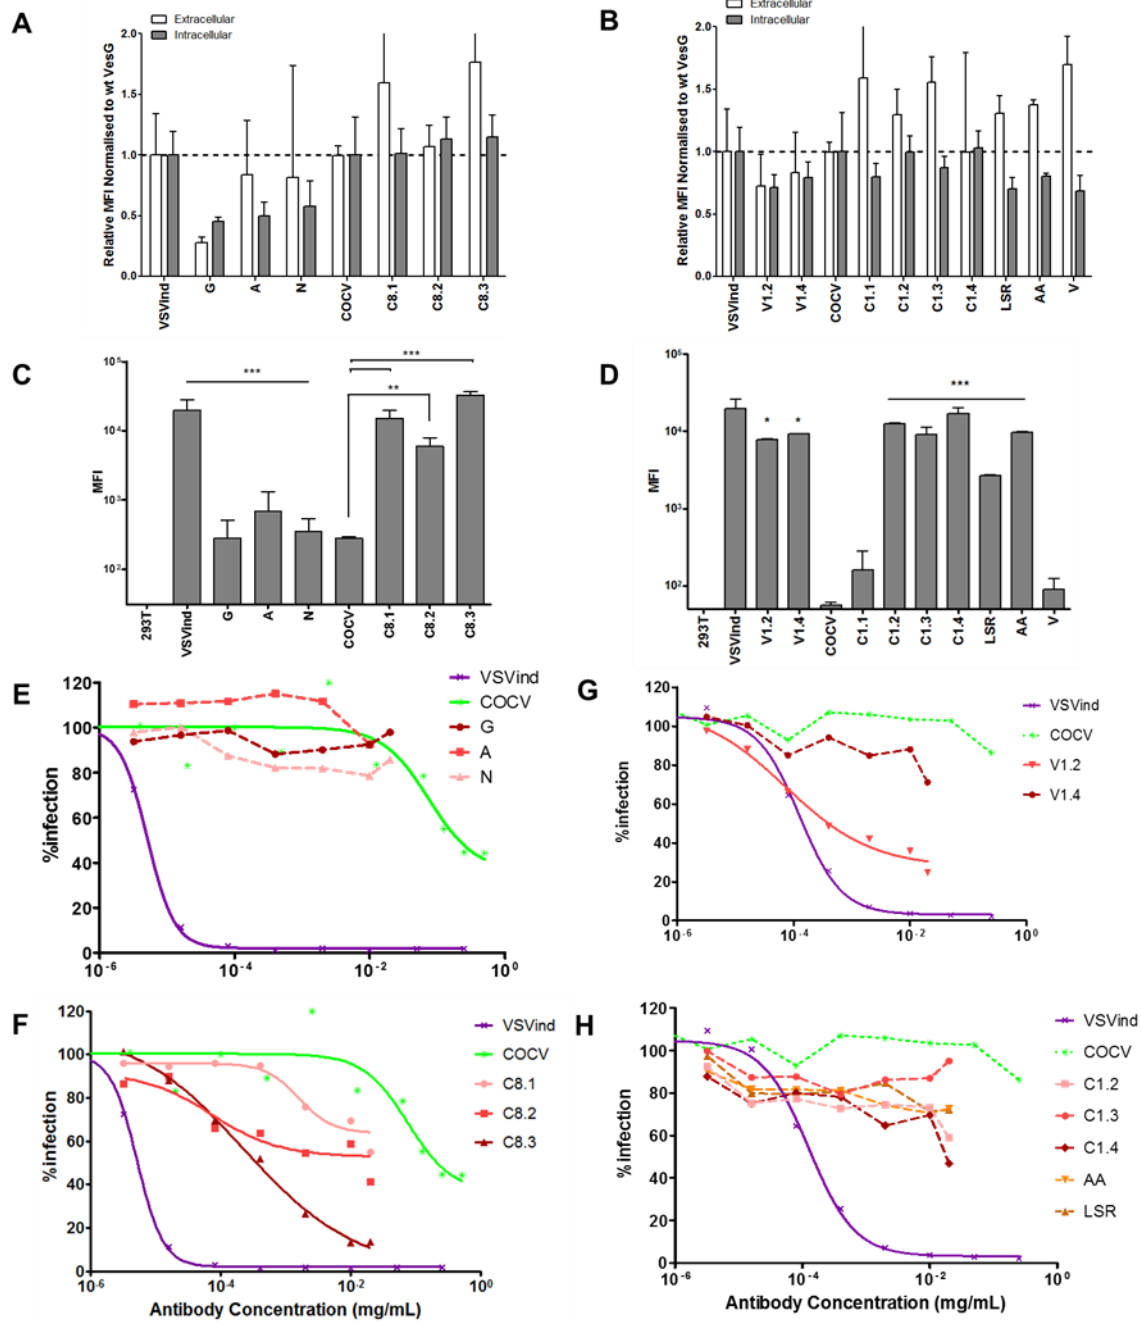

614 **Figure 5: Investigation of antibody binding to mutant G proteins and**  
 615 **neutralisation of mutant-LVs.** HEK293T cells were transfected to express the mutant  
 616 G proteins on their surface. (A-B) The cells expressing chimeric mutants were stained  
 617 with extracellular VSV-Poly (white bars) and intracellular P5D4 (grey bars) as  
 618 expression control for the G proteins. The measured MFI values were normalised to  
 619 the wt VesG signals for each set of mutants. The same population of cells were also  
 620 incubated with (C) 8G5F11 and (D) IE9F9 at saturating concentrations. One-way  
 621 ANOVA analysis with Dunnett's post-test was performed to compare the MFI values  
 622 of mutant G proteins to that of their wild-type counterpart. Legged lines denote the

623 significance of a single comparison, while straight lines signify all the individual  
624 comparisons within the group share the denoted significance unless otherwise stated  
625 (\*,  $p < 0.05$ ; \*\*,  $p < 0.01$ ; \*\*\*,  $p < 0.001$ ). This assay was performed three times in  
626 duplicates; mean  $\pm$  SD is plotted above. The neutralisation curves for select mutant  
627 and chimeric G pseudotyped LVs are plotted for **(E-F)** 8G5F11 and **(G-H)** IE9F9. Solid  
628 lines signify the neutralisation effect observed. **(E-G)** Previously reported reductions  
629 in binding for VSVind.G mutants translated into either complete or partial resistance  
630 to neutralisation by both antibodies. For COCV.G mutants **(F-H)**, the mutations  
631 conferred the G proteins sensitivity to neutralisation by 8G5F11 but not by IE9F9. The  
632 curves were fitted using the software GraphPad Prism 5 modelled as an [inhibitor] vs.  
633 response curve with variable Hill Slopes. Data shown represent the mean from three  
634 experiments performed in independent triplicates.

635

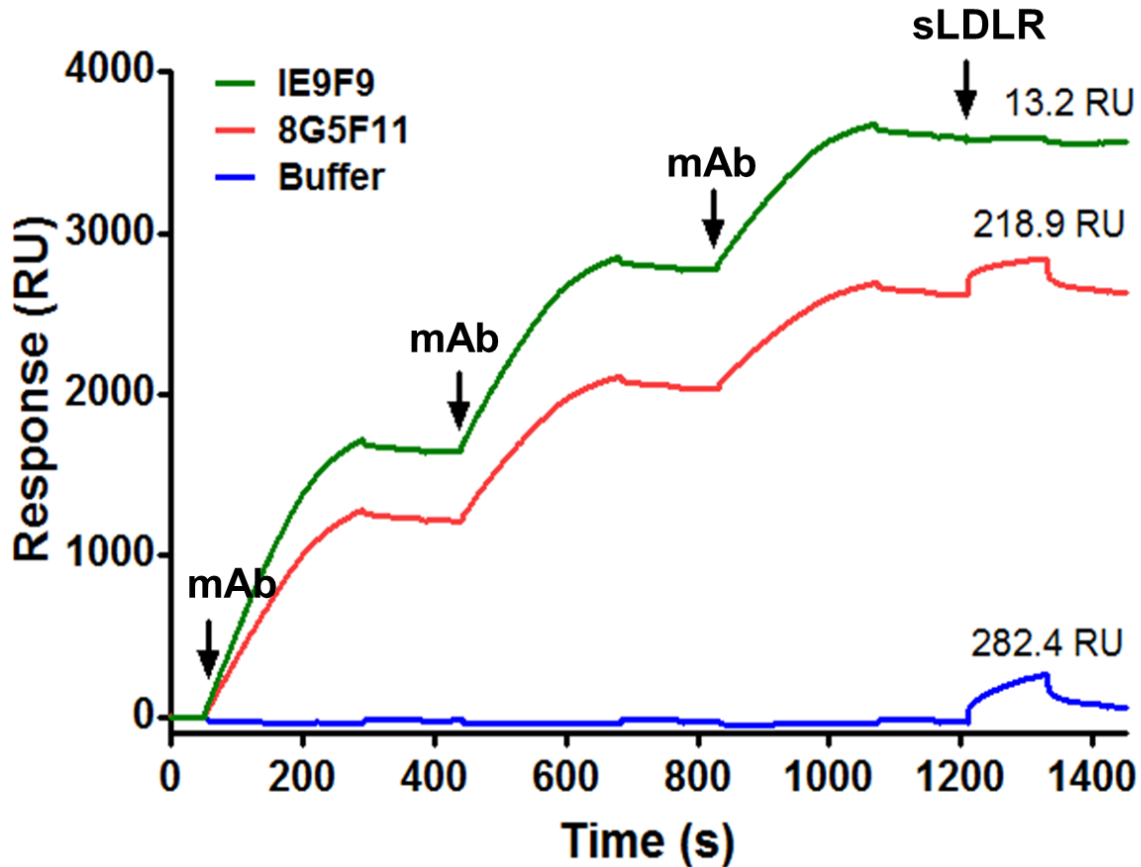

636 **Figure 6: IE9F9 hinders sLDLR binding to Gth.** 8G5F11 and IE9F9 were injected  
637 over immobilised Gth at 10 $\mu$ g/ml concentration three times to achieve binding  
638 saturation. Following this, sLDLR was injected over the chip at a concentration of  
639 10 $\mu$ g/ml and its binding to Gth was measured. As buffer control an identical sLDLR  
640 injection was performed following multiple injections of HBS-EP running buffer.  
641 Measured sLDLR binding levels are indicated above the binding response curves  
642 and times of injections are marked with arrows. The data presented represent one  
643 of the three repeats performed.

644

645 **Funding**

646 AMM and MT studentships are funded by NIBSC.

647 **Acknowledgements**

648 We would like to thank Dr Hiroo Hoshino and Dr Atsushi Oue (Gunma University,  
649 Japan), for providing us with a sample of the polyclonal goat anti-VSVind.G antibody,  
650 VSV-Poly and Drs Yves Gaudin and Aurélie Albertini for the Gth protein.

651 **Author Contributions**

652 AMM performed experiments to obtain presented data and wrote the paper. MT  
653 designed and produced the initial COCV.G/VSVind.G chimeras and obtained  
654 preliminary data on 8G5F11 binding to COCV.G bearing cells. GM and MH helped  
655 designing experiments and interpreting data. MKC and YT supervised the study and  
656 wrote the paper.

657 **Additional Information**

658 **Supplementary information** – accompanies this manuscript.

659 **Competing financial interest** – Authors declare no competing financial interests.
